# Supplementary material for: Stochastic Processes Dominate Soil Microbial Community Assembly during the Restoration of Degraded Karst Forests
Source: MDPI journal article supplement (doi:10.3390/f15040594), 2024-03-25
Supplement: s1 [file s1]

Archive with 1 entries (1 files):
- forests-2898474-supplementary.pdf
